# Supplementary material for: Genome-wide identification and analysis of Lateral Organ Boundaries Domain (LBD) transcription factor gene family in melon (Cucumis melo L.)
Source: PeerJ. 2023 Sep 29;11:e16020. doi: 10.7717/peerj.16020 (PMC10544307; doi:10.7717/peerj.16020)
Supplement: Supplemental Information 4 [file peerj-11-16020-s004.xlsx]

## Sheet: Values
Name	CT	Average	CmLBD01	CT	Average	SD	%		Expression		CmLBD03	CT	Average	SD	%		Expression		CmLBD14	CT	Average	SD	%		Expression		CmLBD16	CT	Average	SD	%		Expression		CmLBD18	CT	Average	SD	%		Expression
Actin_No_1	26.65	26.4267	No_1	27.98	28.2833	0.632166	2.23512	-1.85667	0.276114	0.00617146	No_1	29.05	28.91	0.177764	0.614887	-2.48333	0.178831	0.00109961	No_1	28.56	28.3933	0.194251	0.684142	-1.96667	0.255843	0.00175033	No_1	30.02	30.08	0.0556776	0.185099	-3.65333	0.0794762	0.000147109	No_1	27.82	27.2967	0.463069	1.69643	-0.87	0.547147	0.00928198
Actin_No_1	26.3		No_1	27.86							No_1	28.71							No_1	28.18							No_1	30.13							No_1	27.13
Actin_No_1	26.33		No_1	29.01							No_1	28.97							No_1	28.44							No_1	30.09							No_1	26.94
Actin_No_3	24.79	25.08	No_3	27.01	27.08	0.0608276	0.224622	-2	0.25	0.000561555	No_3	27.12	27.12	0.01	0.0368732	-2.04	0.243164	8.96621e-05	No_3	27.99	27.9867	0.10504	0.37532	-2.90667	0.133354	0.000500505	No_3	29.88	29.3933	0.42336	1.44033	-4.31333	0.0502988	0.000724466	No_3	27.44	27.3433	0.083865	0.306711	-2.26333	0.20829	0.000638849
Actin_No_3	24.99		No_3	27.11							No_3	27.13							No_3	28.09							No_3	29.19							No_3	27.3
Actin_No_3	25.46		No_3	27.12							No_3	27.11							No_3	27.88							No_3	29.11							No_3	27.29
Actin_No_4	27.01	26.9067	No_4	29.13	29.07	0.0848528	0.291891	-2.16333	0.22324	0.000651618	No_4	29.11	29.89	0.846404	2.83173	-2.98333	0.126452	0.00358079	No_4	28.96	29.3567	0.395011	1.34556	-2.45	0.183011	0.00246251	No_4	31.99	31.5667	0.390683	1.23764	-4.66	0.0395549	0.000489549	No_4	28.62	28.5833	0.207445	0.725754	-1.67667	0.312805	0.00227019
Actin_No_4	27.01		No_4	29.01							No_4	29.77							No_4	29.75							No_4	31.22							No_4	28.77
Actin_No_4	26.7		No_4								No_4	30.79							No_4	29.36							No_4	31.49							No_4	28.36
Actin_No_5	26.11	25.9533	No_5	25.42	25.7233	0.321299	1.24906	0.23	1.17283	0.0146494	No_5	27.47	27.7233	0.221435	0.79873	-1.77	0.293209	0.00234195	No_5	28.79	28.2767	0.453578	1.60407	-2.32333	0.199805	0.00320502	No_5	28.86	28.98	0.1253	0.432366	-3.02667	0.122711	0.000530559	No_5	26.23	26.5067	0.254231	0.95912	-0.553333	0.681444	0.00653587
Actin_No_5	25.79		No_5	25.69							No_5	27.82							No_5	28.11							No_5	29.11							No_5	26.73
Actin_No_5	25.96		No_5	26.06							No_5	27.88							No_5	27.93							No_5	28.97							No_5	26.56
Actin_No_6	24.79	25.08	No_6	26.18	26.1967	0.0152753	0.0583099	-1.11667	0.461158	0.000268901	No_6	26.18	26.4433	0.260064	0.983477	-1.36333	0.388683	0.00382261	No_6	30.87	30.3467	0.656531	2.16344	-5.26667	0.0259762	0.000561979	No_6	30.03	29.8967	0.130128	0.43526	-4.81667	0.0354845	0.00015445	No_6	26.98	27.2	0.255343	0.938761	-2.12	0.230047	0.00215959
Actin_No_6	24.99		No_6	26.2							No_6	26.7							No_6	30.56							No_6	29.89							No_6	27.14
Actin_No_6	25.46		No_6	26.21							No_6	26.45							No_6	29.61							No_6	29.77							No_6	27.48
Actin_No_7	27.01	26.9067	No_7	29.13	29.1233	0.011547	0.0396486	-2.21667	0.215138	8.52992e-05	No_7	30.01	30.1467	0.219621	0.728508	-3.24	0.105843	0.000771076	No_7	29.77	30.1033	0.50964	1.69297	-3.19667	0.109071	0.00184653	No_7	31.08	30.8367	0.261598	0.848333	-3.93	0.0656073	0.000556568	No_7	26.63	26.7	0.06245	0.233895	0.206667	1.15402	0.00269919
Actin_No_7	27.01		No_7	29.11							No_7	30.4							No_7	29.85							No_7	30.87							No_7	26.72
Actin_No_7	26.7		No_7	29.13							No_7	30.03							No_7	30.69							No_7	30.56							No_7	26.75
Actin_No_8	26.11	25.9533	No_8	27.98	27.79	0.219317	0.789194	-1.83667	0.279968	0.00220949	No_8	25.42	25.3633	0.115902	0.456968	0.59	1.50525	0.00687849	No_8	29.34	30.5233	1.50706	4.93741	-4.57	0.042101	0.0020787	No_8	29.61	29.7433	0.122202	0.410855	-3.79	0.072293	0.00029702	No_8	29.11	29.1433	0.710587	2.43825	-3.19	0.109576	0.00267173
Actin_No_8	25.79		No_8	27.84							No_8	25.44							No_8	30.01							No_8	29.77							No_8	29.87
Actin_No_8	25.96		No_8	27.55							No_8	25.23							No_8	32.22							No_8	29.85							No_8	28.45
Actin_No_9	24.79	25.08	No_9	25.42	25.7233	0.321299	1.24906	-0.643333	0.640232	0.00799687	No_9	25.42	25.7233	0.321299	1.24906	-0.643333	0.640232	0.00799687	No_9	30.99	30.7133	0.604511	1.96824	-5.63333	0.0201464	0.000396529	No_9	30.69	30.0133	0.675006	2.24902	-4.93333	0.0327279	0.000736058	No_9	26.63	25.9533	0.608797	2.34574	-0.873333	0.545884	0.012805
Actin_No_9	24.99		No_9	25.69							No_9	25.69							No_9	31.13							No_9	29.34							No_9	25.45
Actin_No_9	25.46		No_9	26.06							No_9	26.06							No_9	30.02							No_9	30.01							No_9	25.78
Actin_No_10	27.01	26.9067	No_10	28.88	28.87	0.115326	0.399465	-1.96333	0.256435	0.00102437	No_10	27.16	27.3567	0.358097	1.30899	-0.45	0.732043	0.00958239	No_10	30.54	30.8367	0.277549	0.900061	-3.93	0.0656073	0.000590506	No_10	32.22	31.4467	0.673375	2.14132	-4.54	0.0429857	0.000920462	No_10	28.86	27.9467	1.48769	5.32333	-1.04	0.486327	0.0258888
Actin_No_10	27.01		No_10	28.75							No_10	27.14							No_10	30.88							No_10	30.99							No_10	28.75
Actin_No_10	26.7		No_10	28.98							No_10	27.77							No_10	31.09							No_10	31.13							No_10	26.23
Actin_No_11	26.11	25.9533	No_11	27.01	27.08	0.0608276	0.224622	-1.12667	0.457973	0.00102871	No_11	27.56	27.3	0.230651	0.844876	-1.34667	0.393199	0.00332205	No_11	31.76	31.12	0.592706	1.90458	-5.16667	0.0278406	0.000530247	No_11	30.02	30.48	0.433128	1.42102	-4.52667	0.0433848	0.000616508	No_11	25.63	25.88	0.217945	0.842137	0.0733333	1.05214	0.0088605
Actin_No_11	25.79		No_11	27.11							No_11	27.22							No_11	31.01							No_11	30.54							No_11	26.03
Actin_No_11	25.96		No_11	27.12							No_11	27.12							No_11	30.59							No_11	30.88							No_11	25.98
Actin_No_12	24.79	25.08	No_12	25.55	25.3	0.217945	0.861442	-0.22	0.858565	0.00739605	No_12	25.6	25.7567	0.146401	0.568401	-0.676667	0.625609	0.00355597	No_12	31.49	31.7033	0.386954	1.22055	-6.62333	0.0101433	0.000123803	No_12	31.09	31.2867	0.411866	1.31643	-6.20667	0.0135396	0.000178239	No_12	27.82	27.2933	0.964642	3.53435	-2.21333	0.215636	0.00762131
Actin_No_12	24.99		No_12	25.15							No_12	25.89							No_12	32.15							No_12	31.76							No_12	27.88
Actin_No_12	25.46		No_12	25.2							No_12	25.78							No_12	31.47							No_12	31.01							No_12	26.18
Actin_No_13	27.01	26.9067	No_13	26.01	25.92	0.200749	0.774493	0.986667	1.9816	0.0153474	No_13	27.01	27.0833	0.064291	0.237382	-0.176667	0.884745	0.00210023	No_13	32.16	32.8267	0.797392	2.4291	-5.92	0.0165159	0.000401187	No_13	30.59	31.41	0.783071	2.49306	-4.50333	0.0440922	0.00109925	No_13	26.7	27.72	1.98713	7.16859	-0.813333	0.569066	0.040794
Actin_No_13	27.01		No_13	25.69							No_13	27.13							No_13	33.71							No_13	31.49							No_13	26.45
Actin_No_13	26.7		No_13	26.06							No_13	27.11							No_13	32.61							No_13	32.15							No_13	30.01
Actin_No_14	26.11	26.7033	No_14	27.98	28.2833	0.632166	2.23512	-1.58	0.334482	0.00747606	No_14	27.88	27.57	0.269629	0.977981	-0.866667	0.548412	0.00536337	No_14	28.81	30.37	1.41478	4.65848	-3.66667	0.0787451	0.00366832	No_14	31.47	32.4467	1.14718	3.5356	-5.74333	0.0186674	0.000660006	No_14	30.4	28.6167	2.77457	9.69564	-1.91333	0.265478	0.0257398
Actin_No_14	26.99		No_14	27.86							No_14	27.39							No_14	30.73							No_14	32.16							No_14	30.03
Actin_No_14	27.01		No_14	29.01							No_14	27.44							No_14	31.57							No_14	33.71							No_14	25.42
Actin_No_15	24.79	25.08	No_15	25.11	25.3067	0.170392	0.673308	-0.226667	0.854607	0.00575413	No_15	25.11	25.9633	0.786787	3.03038	-0.883333	0.542113	0.0164281	No_15	32.87	31.4333	1.49841	4.76695	-6.35333	0.0122308	0.000583037	No_15	32.61	30.7167	1.90004	6.18568	-5.63667	0.0200999	0.00124332	No_15	25.44	25.3633	0.115902	0.456968	-0.283333	0.82169	0.00375486
Actin_No_15	24.99		No_15	25.41							No_15	26.66							No_15	31.55							No_15	28.81							No_15	25.23
Actin_No_15	25.46		No_15	25.4							No_15	26.12							No_15	29.88							No_15	30.73							No_15	25.42
Actin_No_16	27.01	26.9067	No_16	27.33	27.3967	0.061101	0.223024	-0.49	0.712025	0.00158798	No_16	26.11	26.0333	0.0680686	0.261467	0.873333	1.83189	0.00478979	No_16	29.45	30.6867	2.43336	7.92969	-3.78	0.0727958	0.00577249	No_16	31.57	31.9967	0.756395	2.36398	-5.09	0.0293601	0.000694067	No_16	25.69	26.3033	0.764613	2.90691	0.603333	1.51922	0.0441624
Actin_No_16	27.01		No_16	27.45							No_16	26.01							No_16	29.12							No_16	32.87							No_16	26.06
Actin_No_16	26.7		No_16	27.41							No_16	25.98							No_16	33.49							No_16	31.55							No_16	27.16
Actin_No_17	26.11	25.9533	No_17	25.42	25.7233	0.321299	1.24906	0.23	1.17283	0.0146494	No_17	26.06	26.0033	0.0493288	0.189702	-0.05	0.965936	0.0018324	No_17	33.77	32.4433	1.46565	4.51757	-6.49	0.0111254	0.000502598	No_17	29.88	29.4833	0.381095	1.29258	-3.53	0.0865693	0.00111898	No_17	25.59	25.7467	0.146401	0.568622	0.206667	1.15402	0.00656201
Actin_No_17	25.79		No_17	25.69							No_17	25.98							No_17	32.69							No_17	29.45							No_17	25.88
Actin_No_17	25.96		No_17	26.06							No_17	25.97							No_17	30.87							No_17	29.12							No_17	25.77
Actin_No_18	27.01	26.9667	No_18	27.01	27.08	0.0608276	0.224622	-0.113333	0.92445	0.00207652	No_18	27.01	27.08	0.0608276	0.224622	-0.113333	0.92445	0.00207652	No_18	30.56	29.98	0.508626	1.69655	-3.01333	0.12385	0.00210118	No_18	33.49	33.3167	0.560476	1.68227	-6.35	0.0122591	0.000206231	No_18	27.88	26.92	0.871091	3.23585	0.0466667	1.03288	0.0334223
Actin_No_18	27.01		No_18	27.11							No_18	27.11							No_18	29.61							No_18	33.77							No_18	26.18
Actin_No_18	26.88		No_18	27.12							No_18	27.12							No_18	29.77							No_18	32.69							No_18	26.7
	CmLBD01			CmLBD14			CmLBD18			CmLBD03			CmLBD16
Leaf	0.965656	0.0161715	Leaf	1.07883	0.0210996	Leaf	1.25584	0.00975033	Leaf	0.0194762	0.00614711	Leaf	1.94715	0.00928198
Root	2.2668	0.00956155	Root	1.04316	0.00838966	Root	1.13335	0.0055005	Root	0.0502988	0.00472447	Root	1.20829	0.00463885
Stem	1.26484	0.00865162	Stem	0.126452	0.00858079	Stem	1.08963	0.00846251	Stem	0.339555	0.00448955	Stem	2.3128	0.0522702
Female Flower	0.36566	0.0246494	Female Flower	1.69321	0.00934195	Female Flower	0.199805	0.00920502	Female Flower	0.322711	0.00253056	Female Flower	1.38144	0.0165359
Male Flower	0.298752	0.0122689	Male Flower	2.38868	0.00882261	Male Flower	0.0259762	0.00256198	Male Flower	0.435485	0.00215445	Male Flower	1.23005	0.0221596
Ovary	0.115138	0.0068853	Ovary	1.80584	0.00877108	Ovary	0.178993	0.00884653	Ovary	0.165607	0.00255657	Ovary	1.15402	0.00969919
